# Supplementary material for: Longitudinal profiling of circulating miRNA during cardiac allograft rejection: a proof‐of‐concept study
Source: PubMed Central journal article supplement — ESC Heart Fail. 2021 Mar 13;8(3):1840–9. doi: 10.1002/ehf2.13238 (PMC8120386; doi:10.1002/ehf2.13238), 2021-03-13
Supplement: EHF2-8-1840-s002.pdf [file EHF2-8-1840-s002.pdf]

# HEATMAPS OF DIFFERENTIALLY EXPRESSED MIRNAS

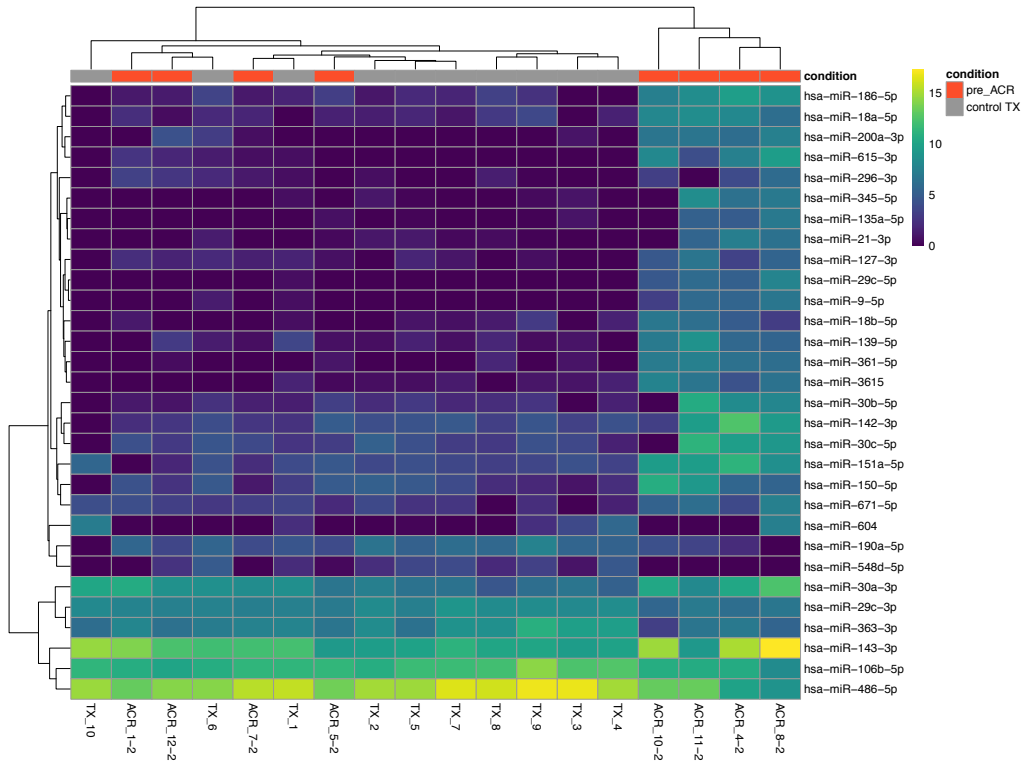

Figure S1.A. Pre ACR vs TX

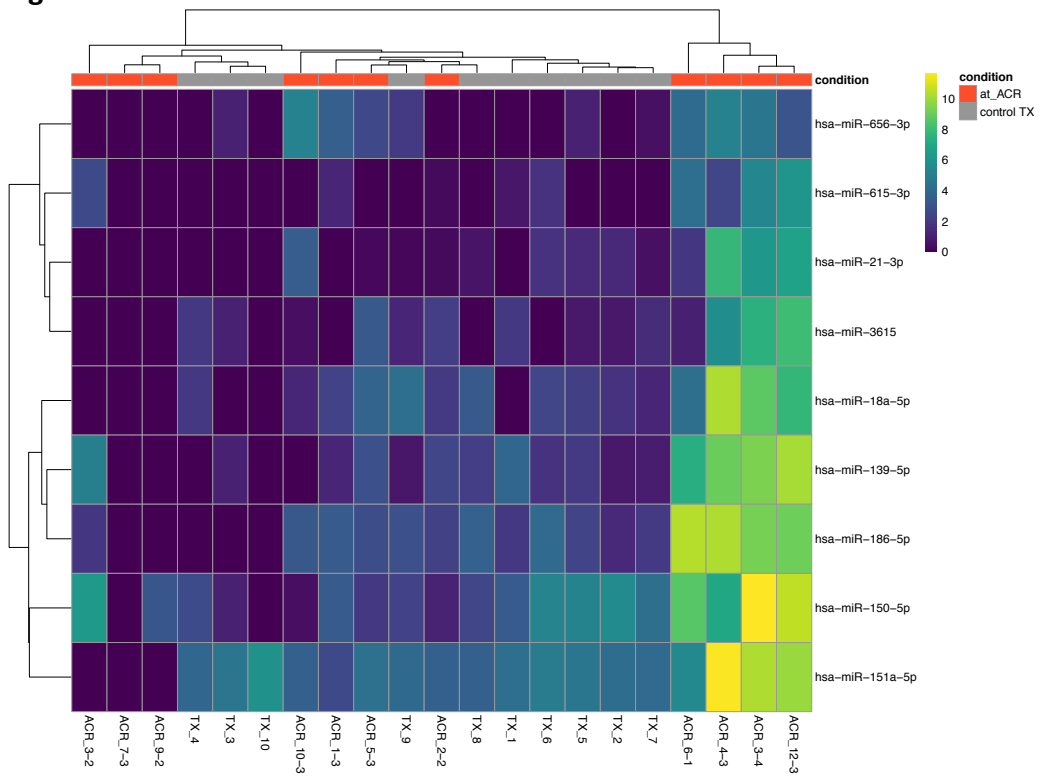

Figure S1.B. At ACR vs. TX

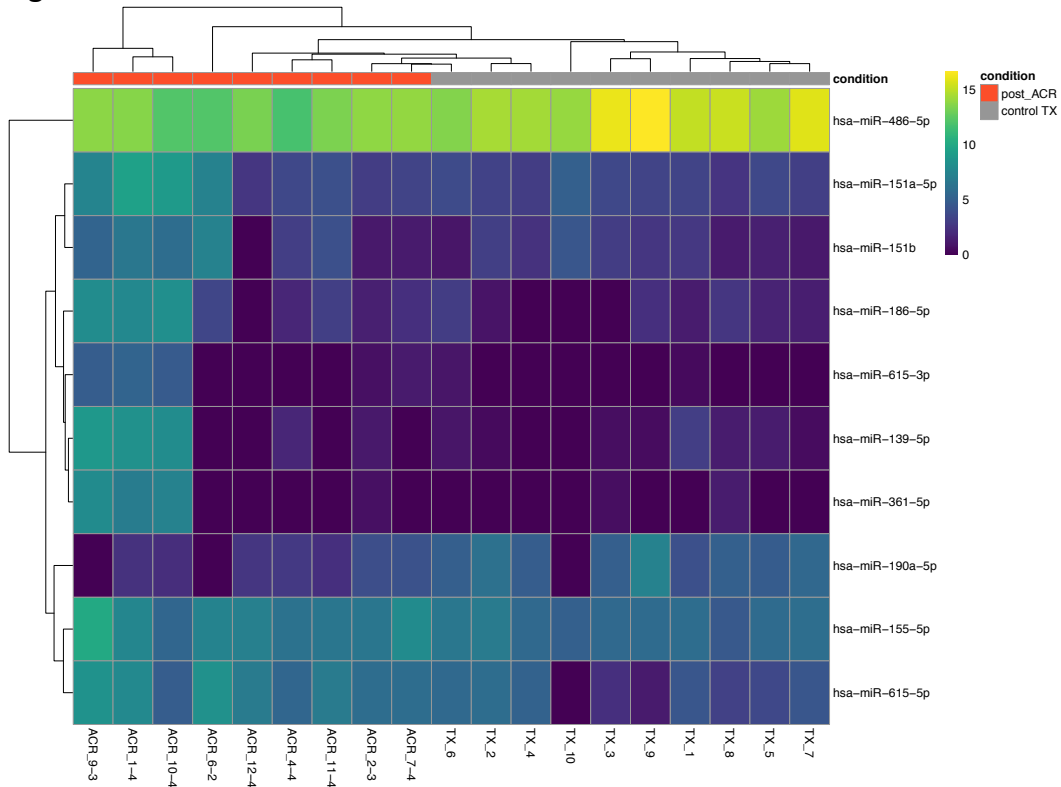

Figure S1.C. Post ACR vs. TX

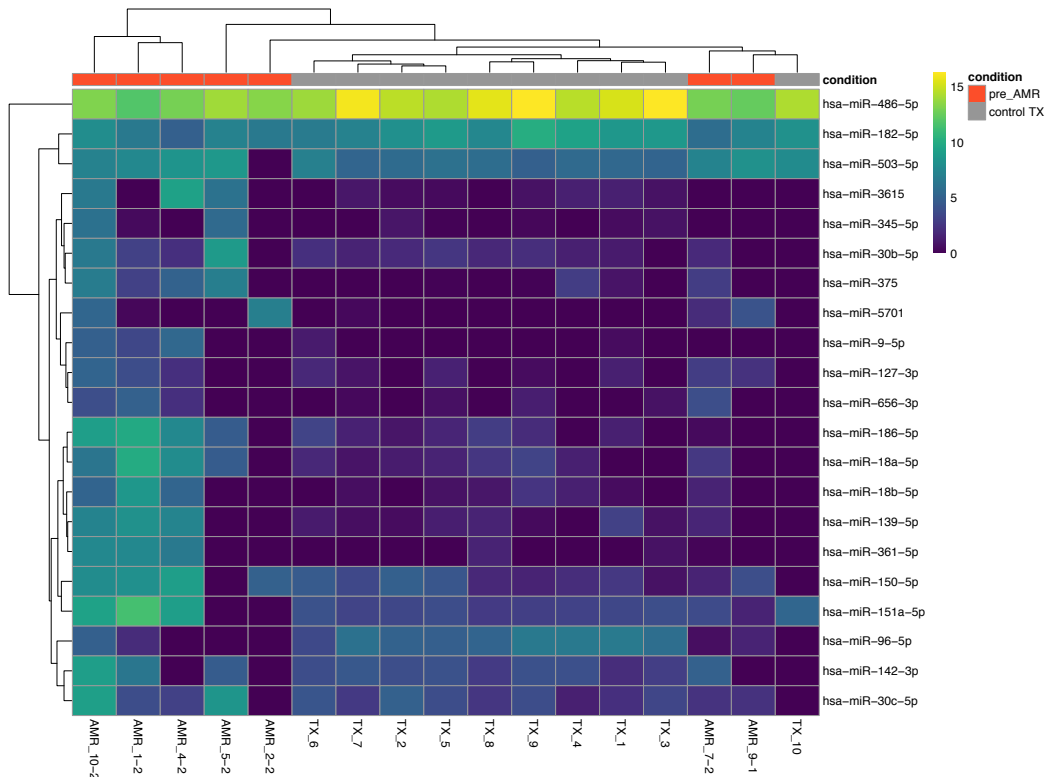

Figure S2.A. Pre AMR vs. TX

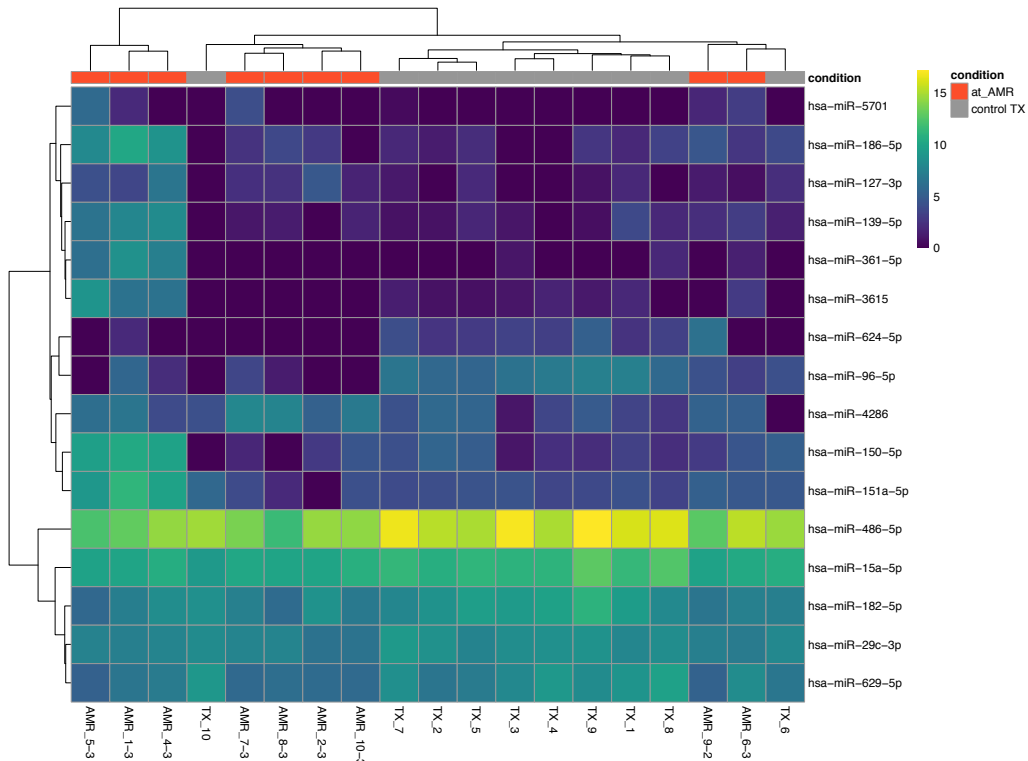

Figure S2.B. At AMR vs. TX

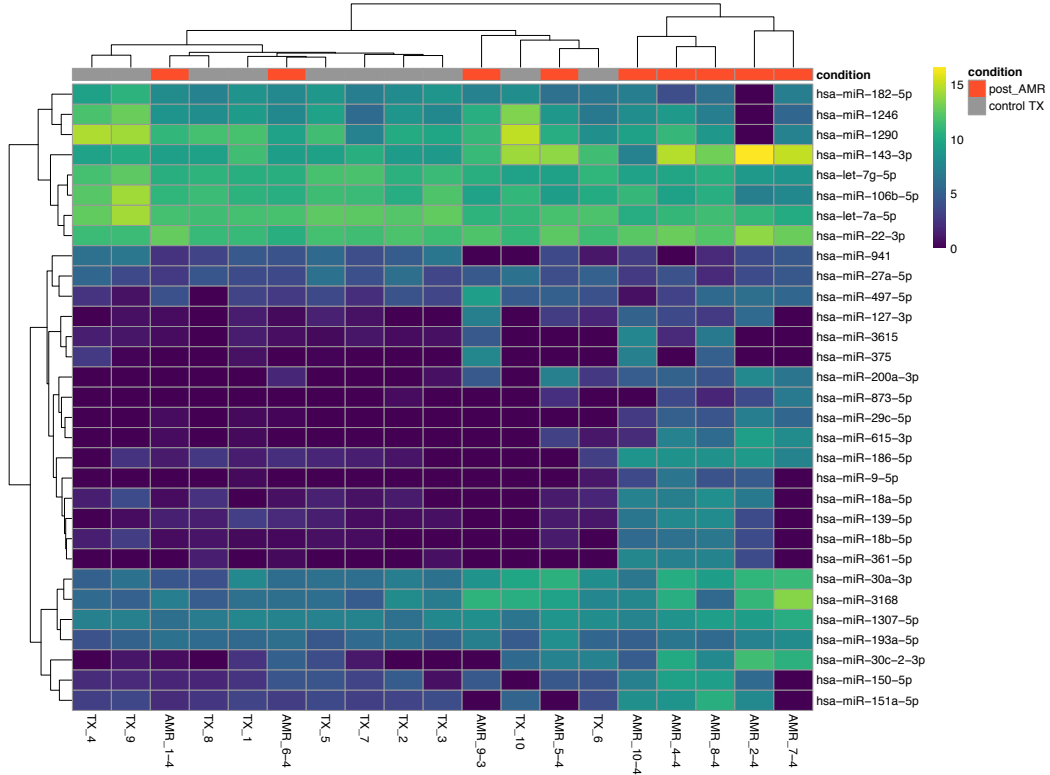

Figure S2.C. Post AMR vs. TX

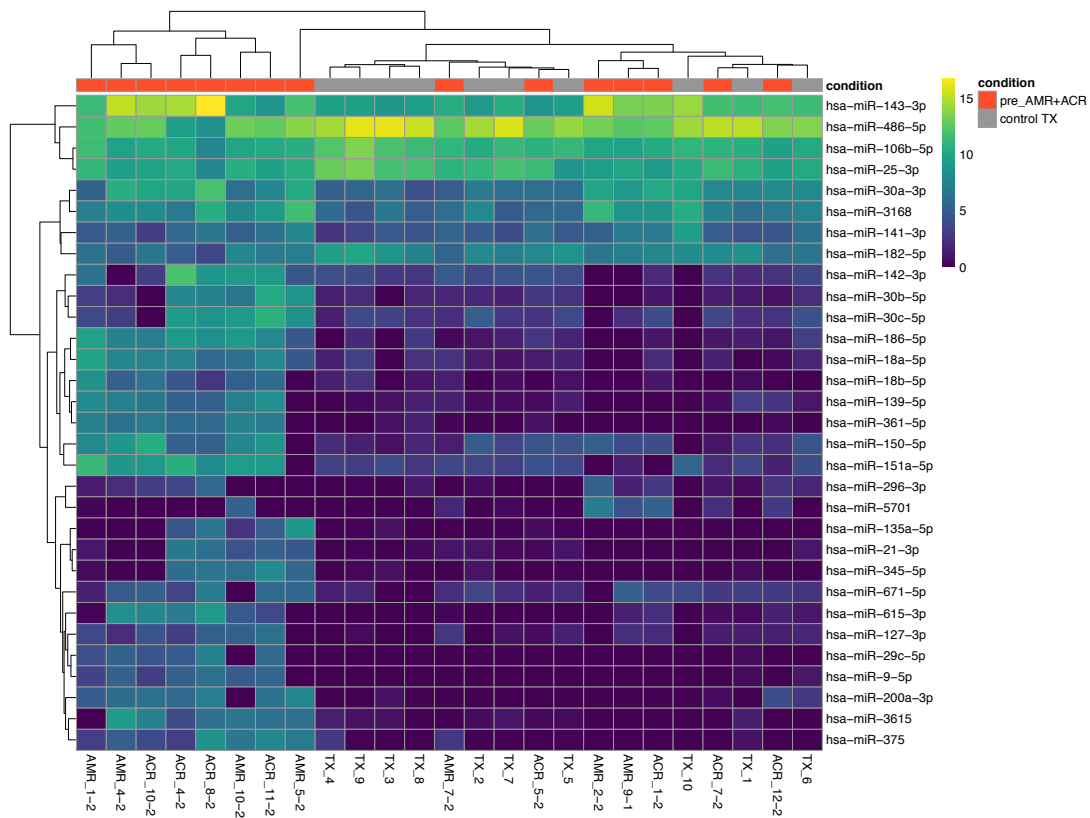

**Figure S3.A. Pre AMR+ACR vs. TX**

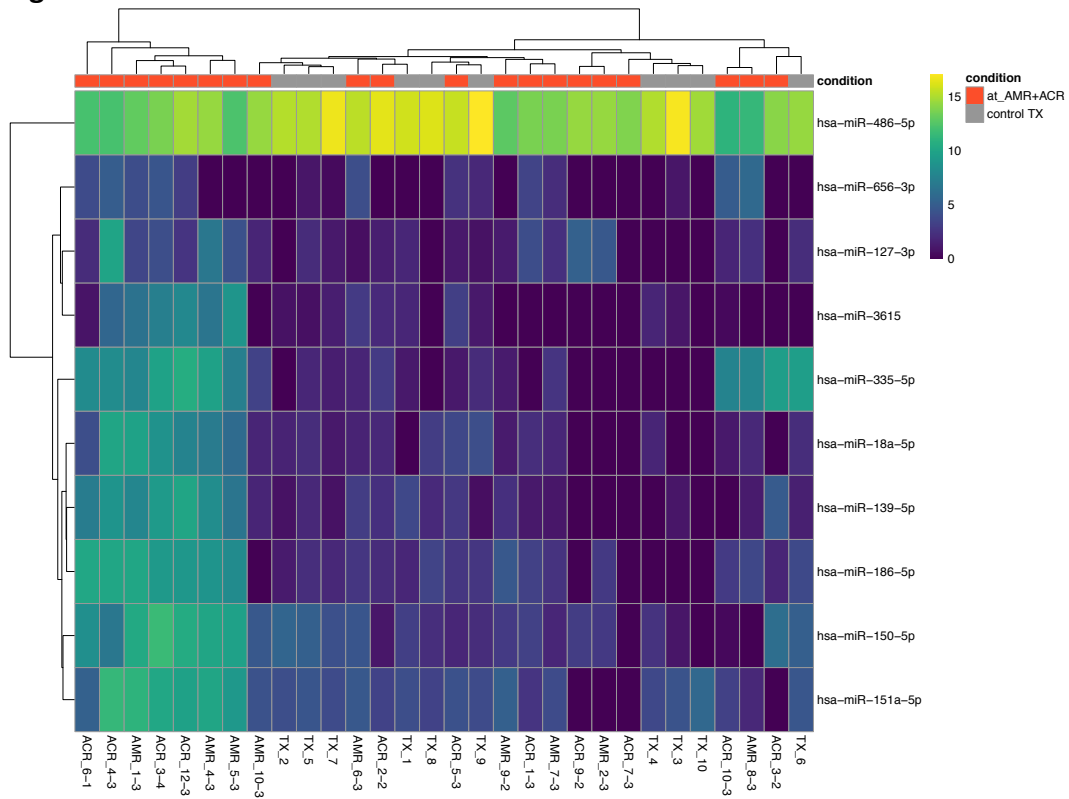

Figure S3.B. At AMR+ACR vs. TX

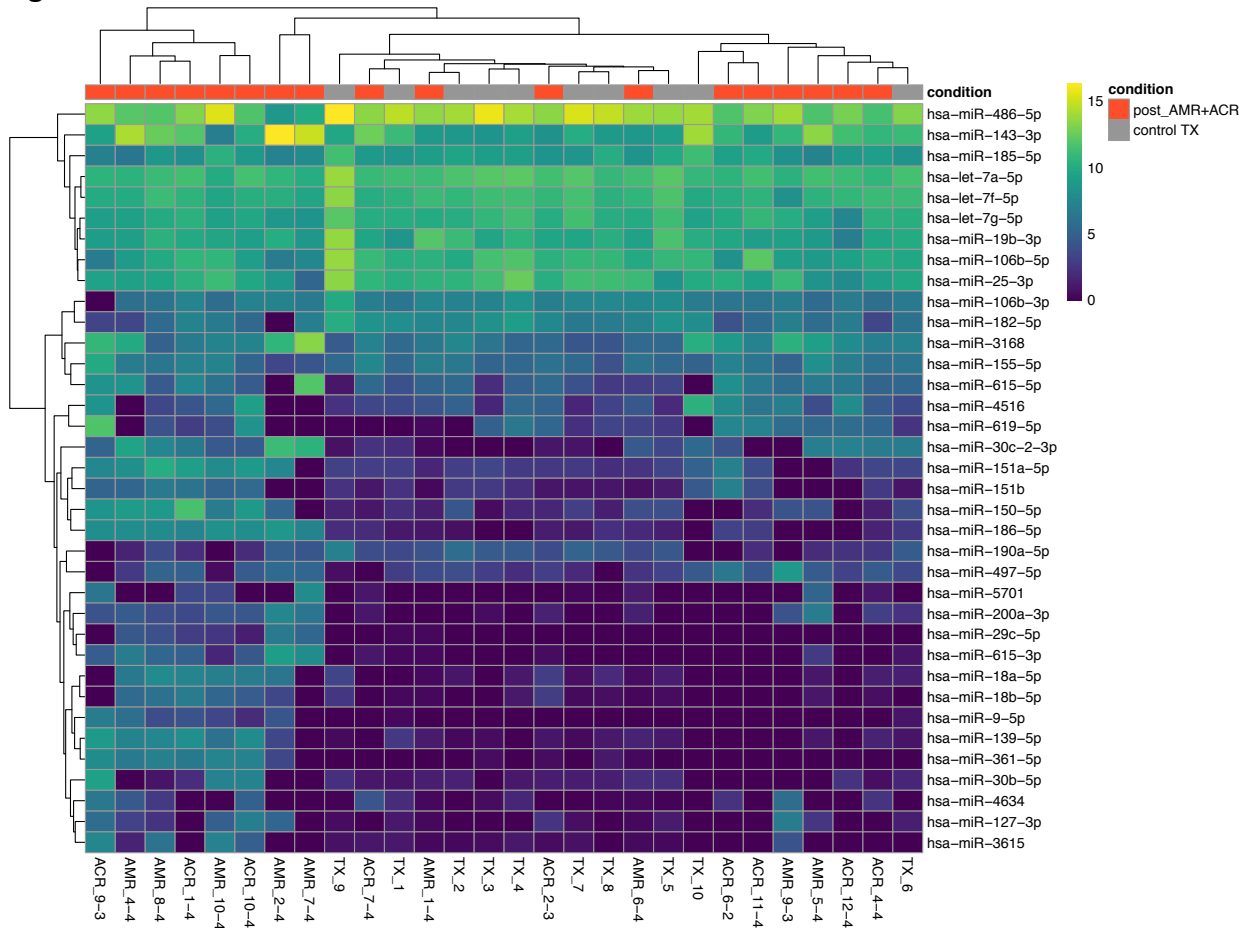

Figure S3.C. Post AMR+ACR vs. TX

# TEMPORAL PATTERNS OF LogFC

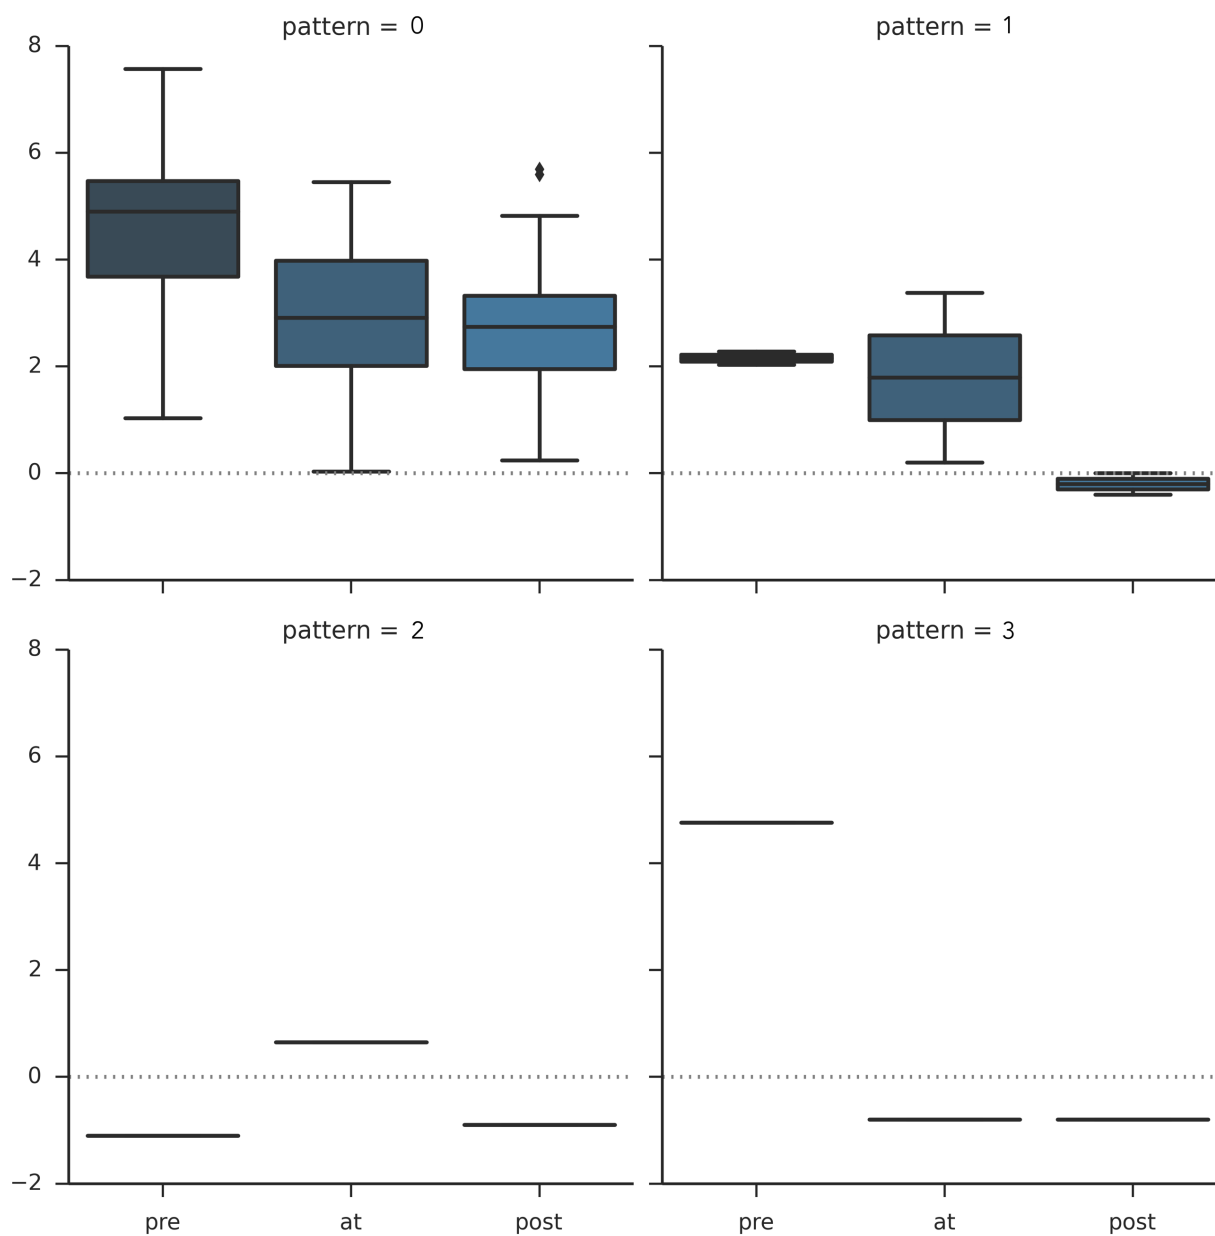

Figure S4.A. ACR patterns

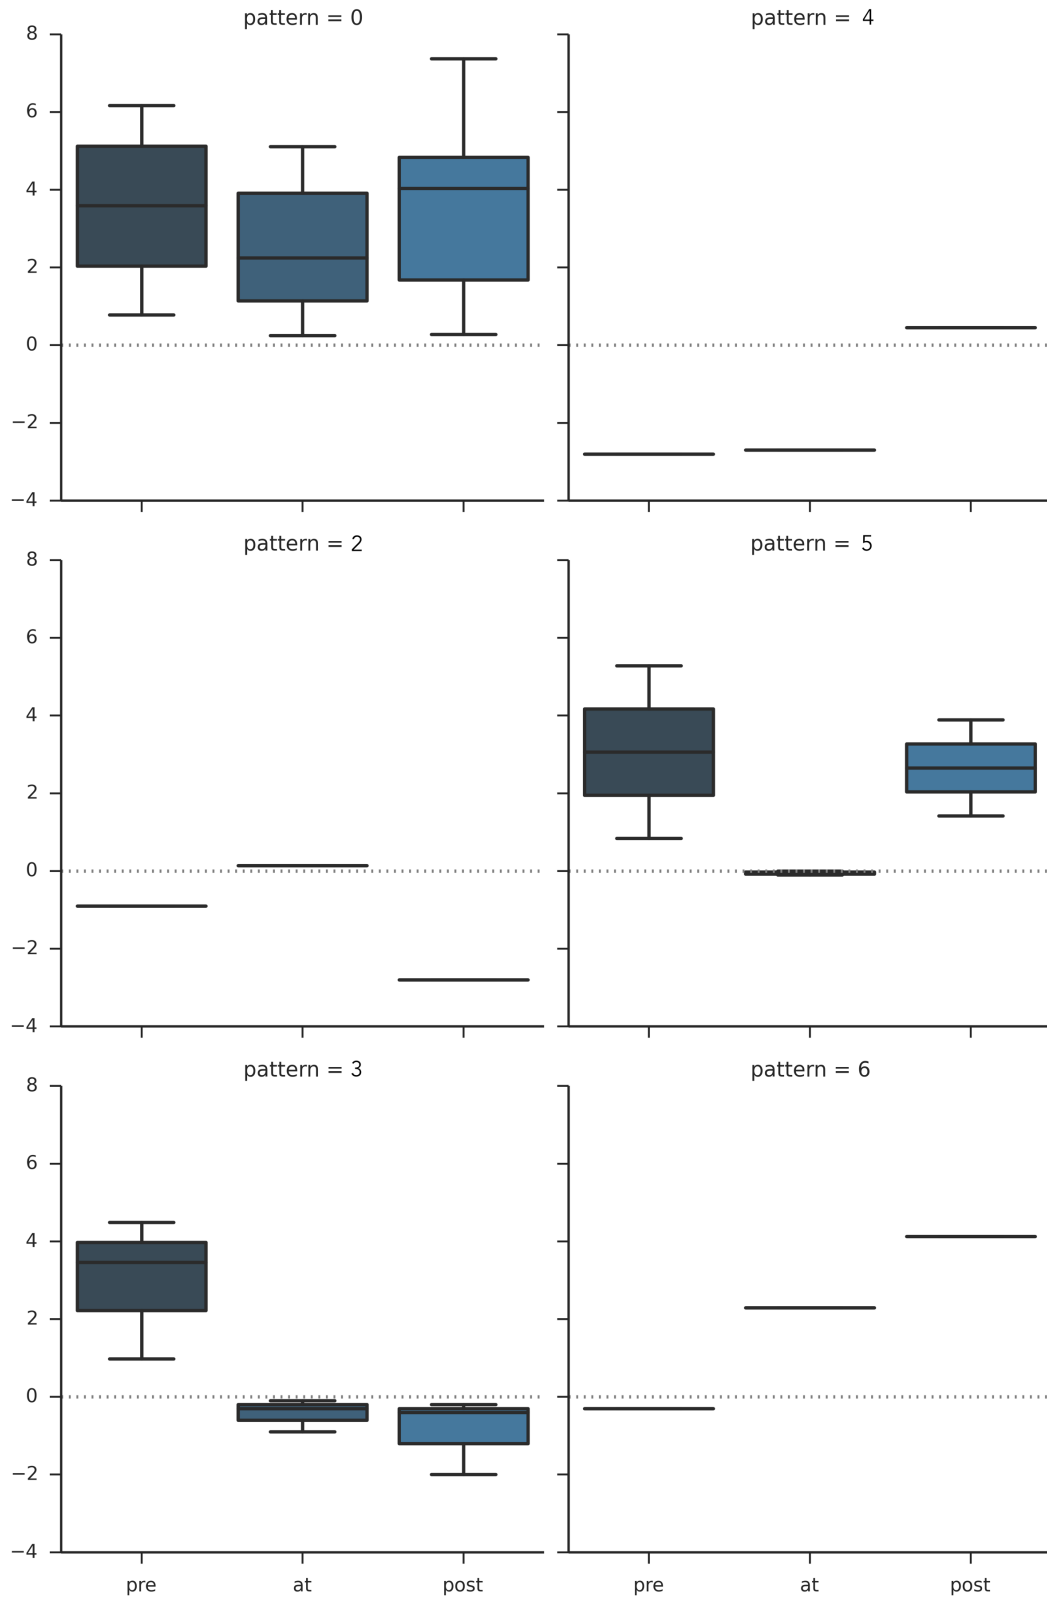

**Figure S4.B. AMR patterns**

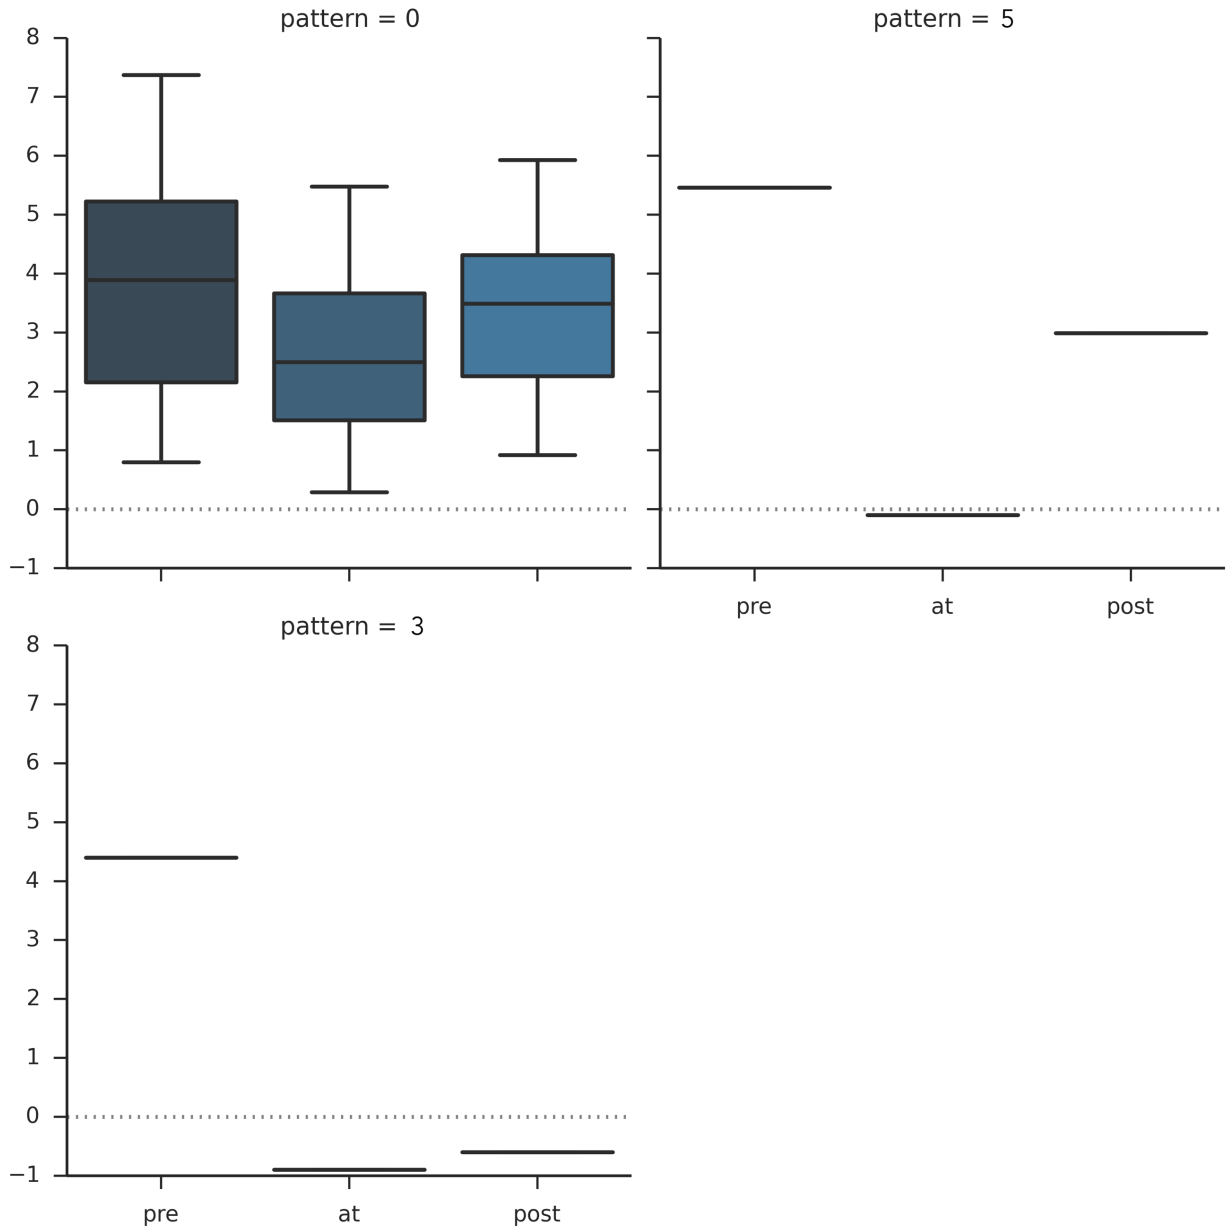

**figure S4.C. AMR+ACR patterns**



# ROC CURVES – CLASSIC METHOD

## ACR

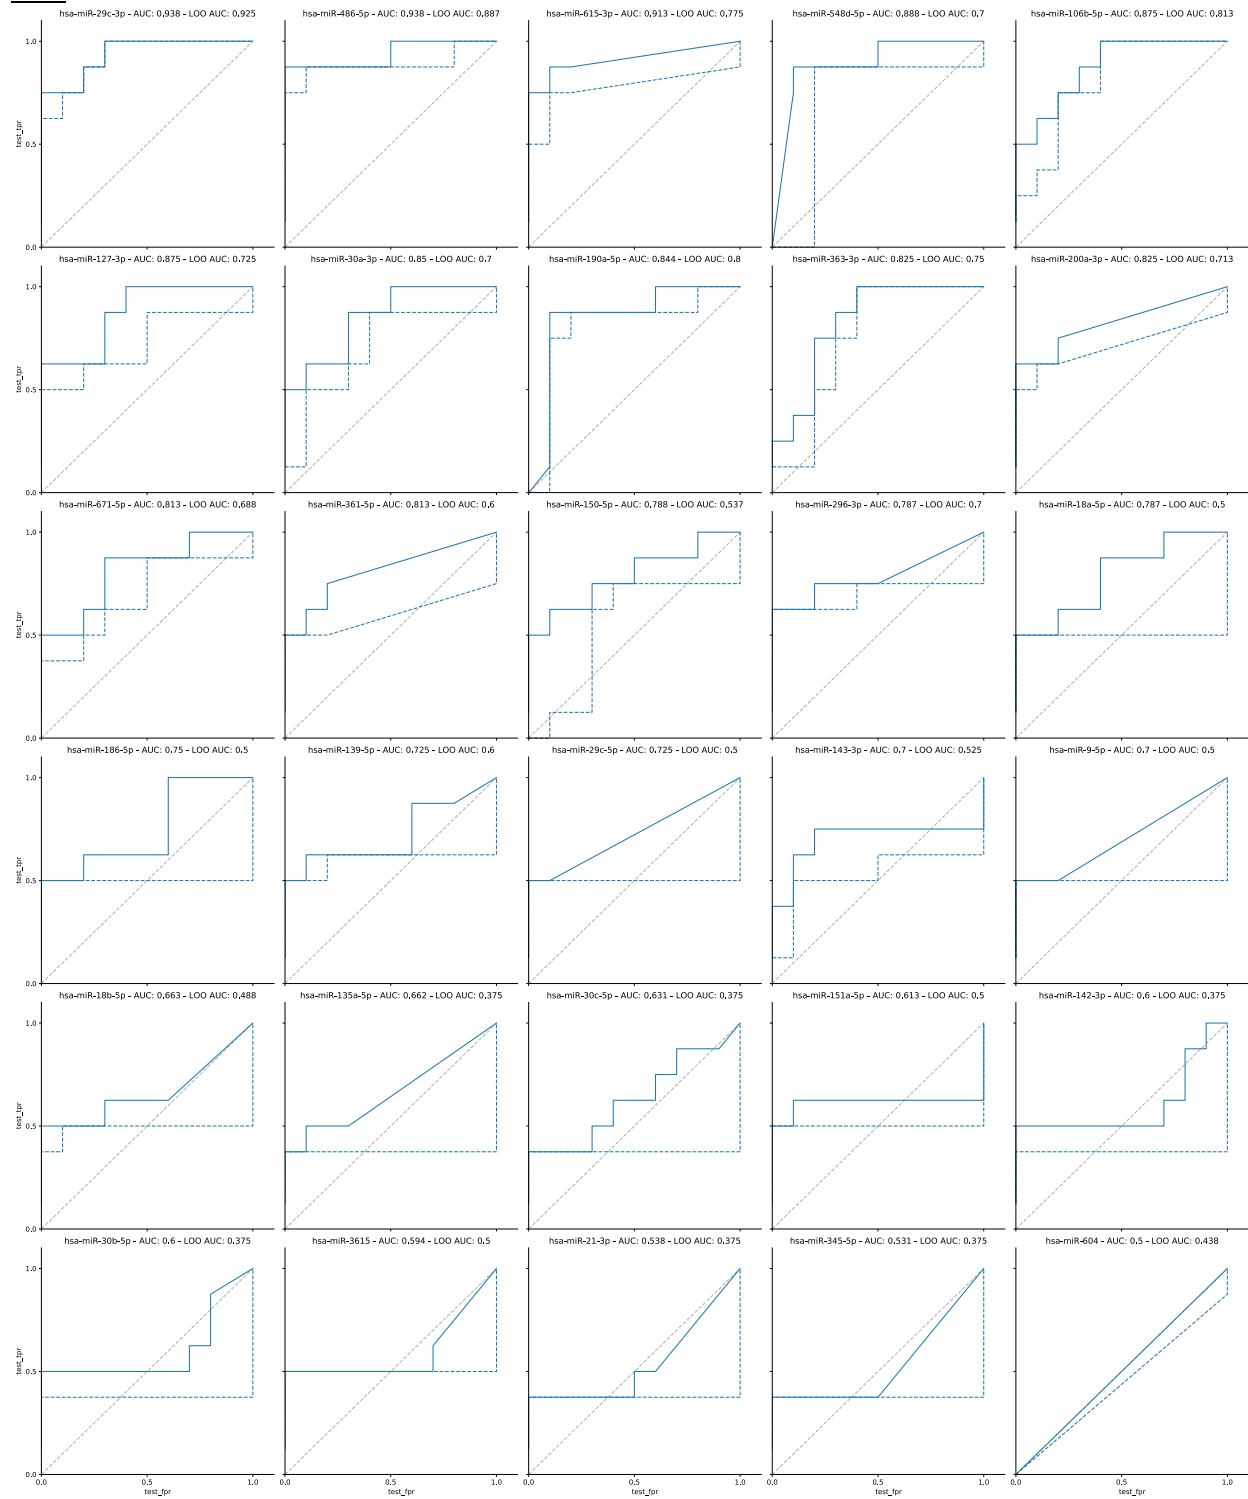

Figure S5.A. preACR

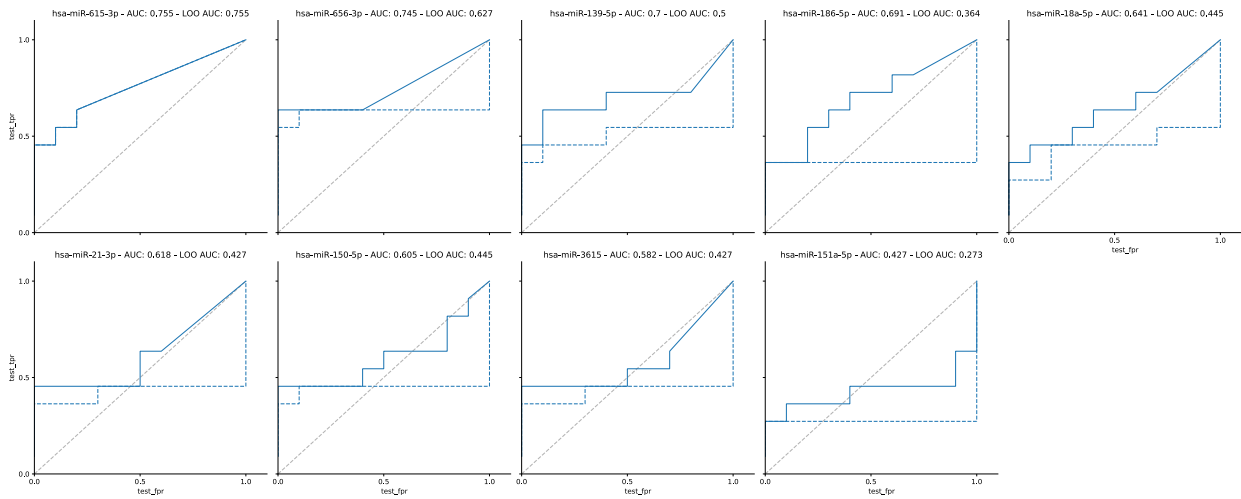

**Figure S5.B. at ACR**

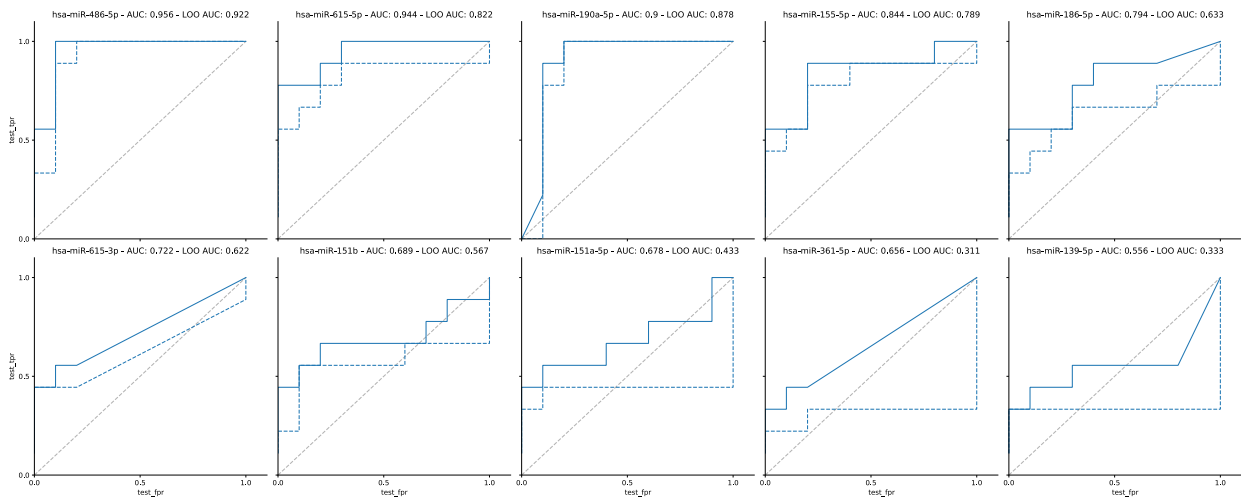

**Figure S5.C. post ACR**

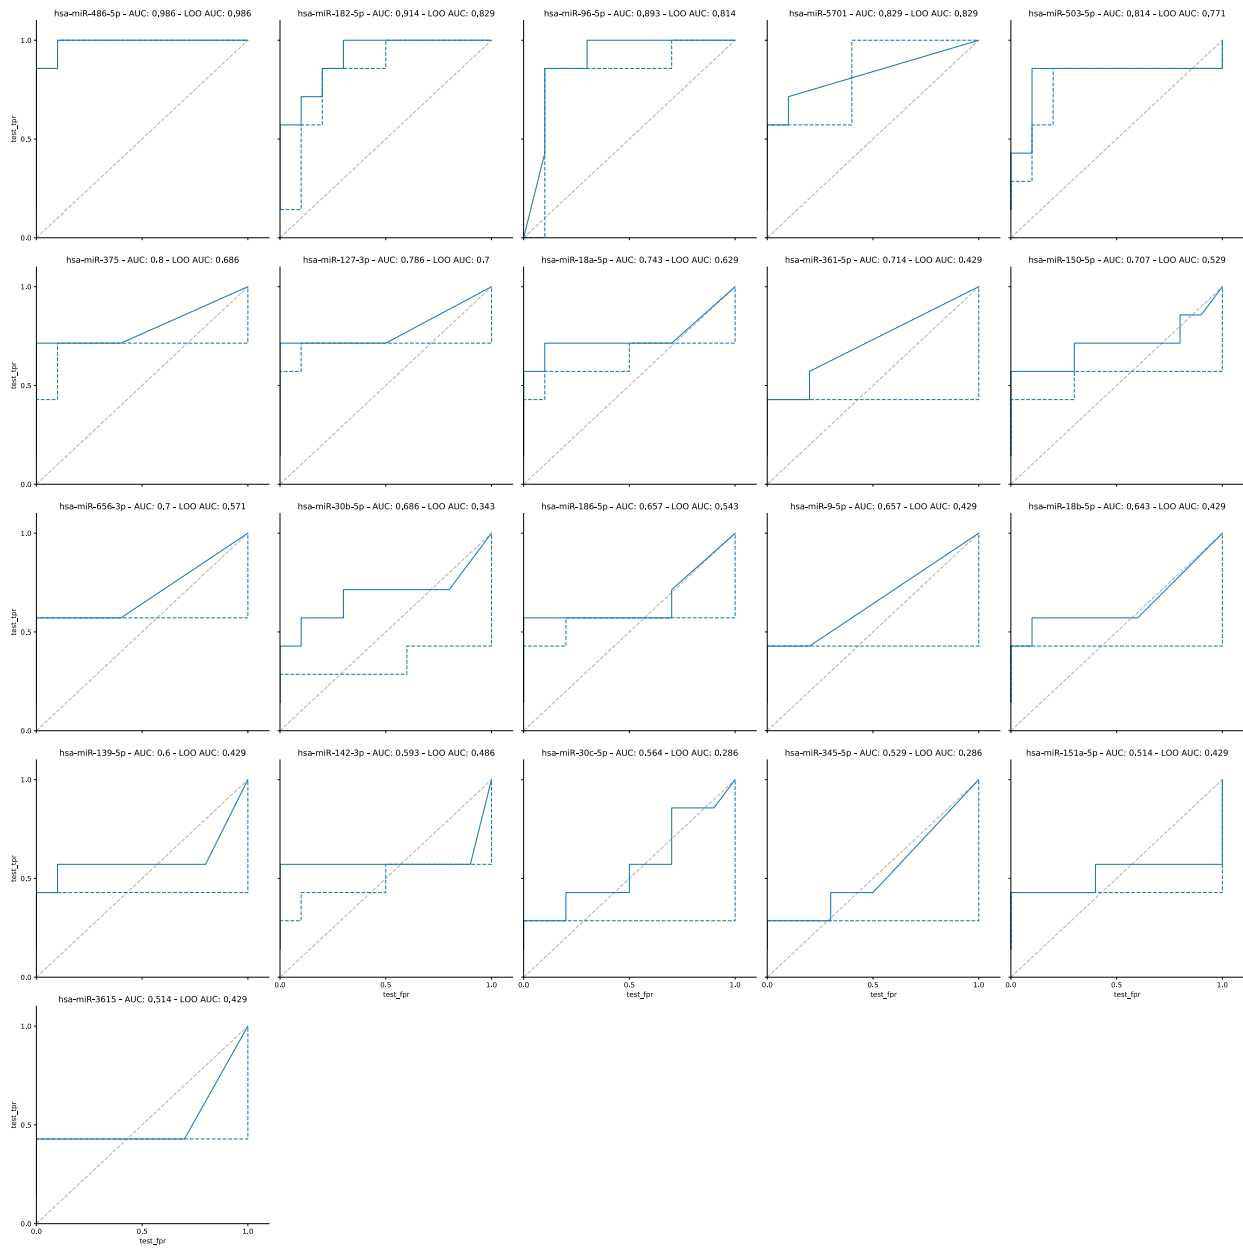

**Figure S6.A. Pre AMR**

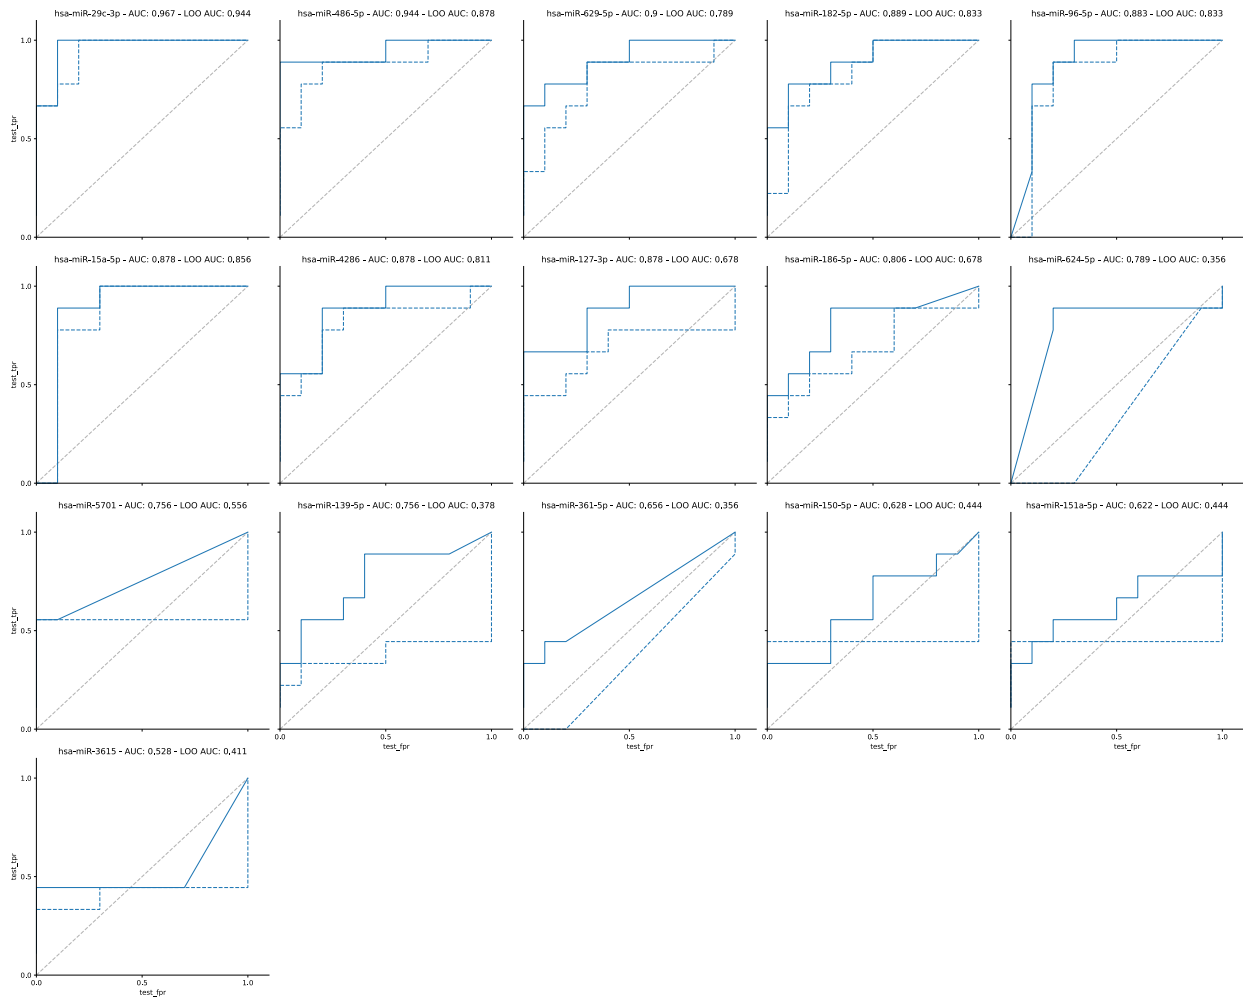

**Figure S6.B. At AMR**

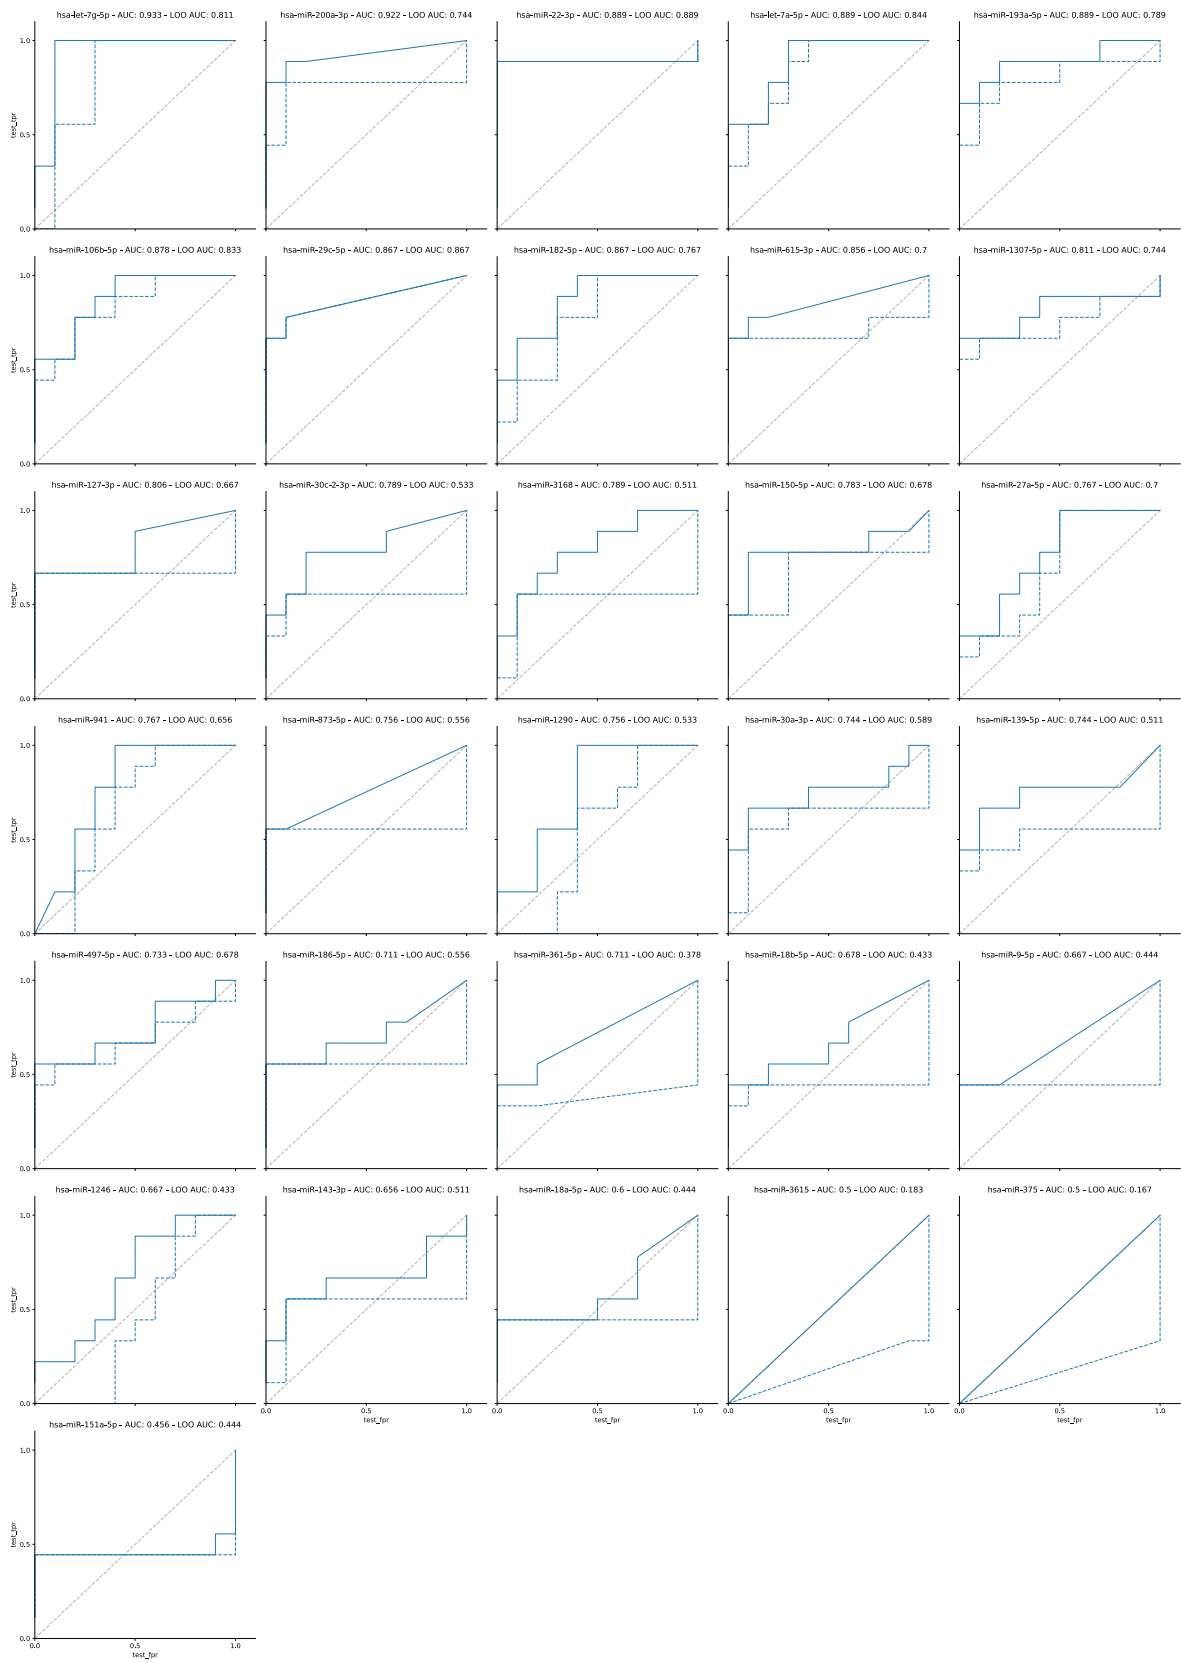

**Figure S6.C. Post AMR**

# AMR+ACR

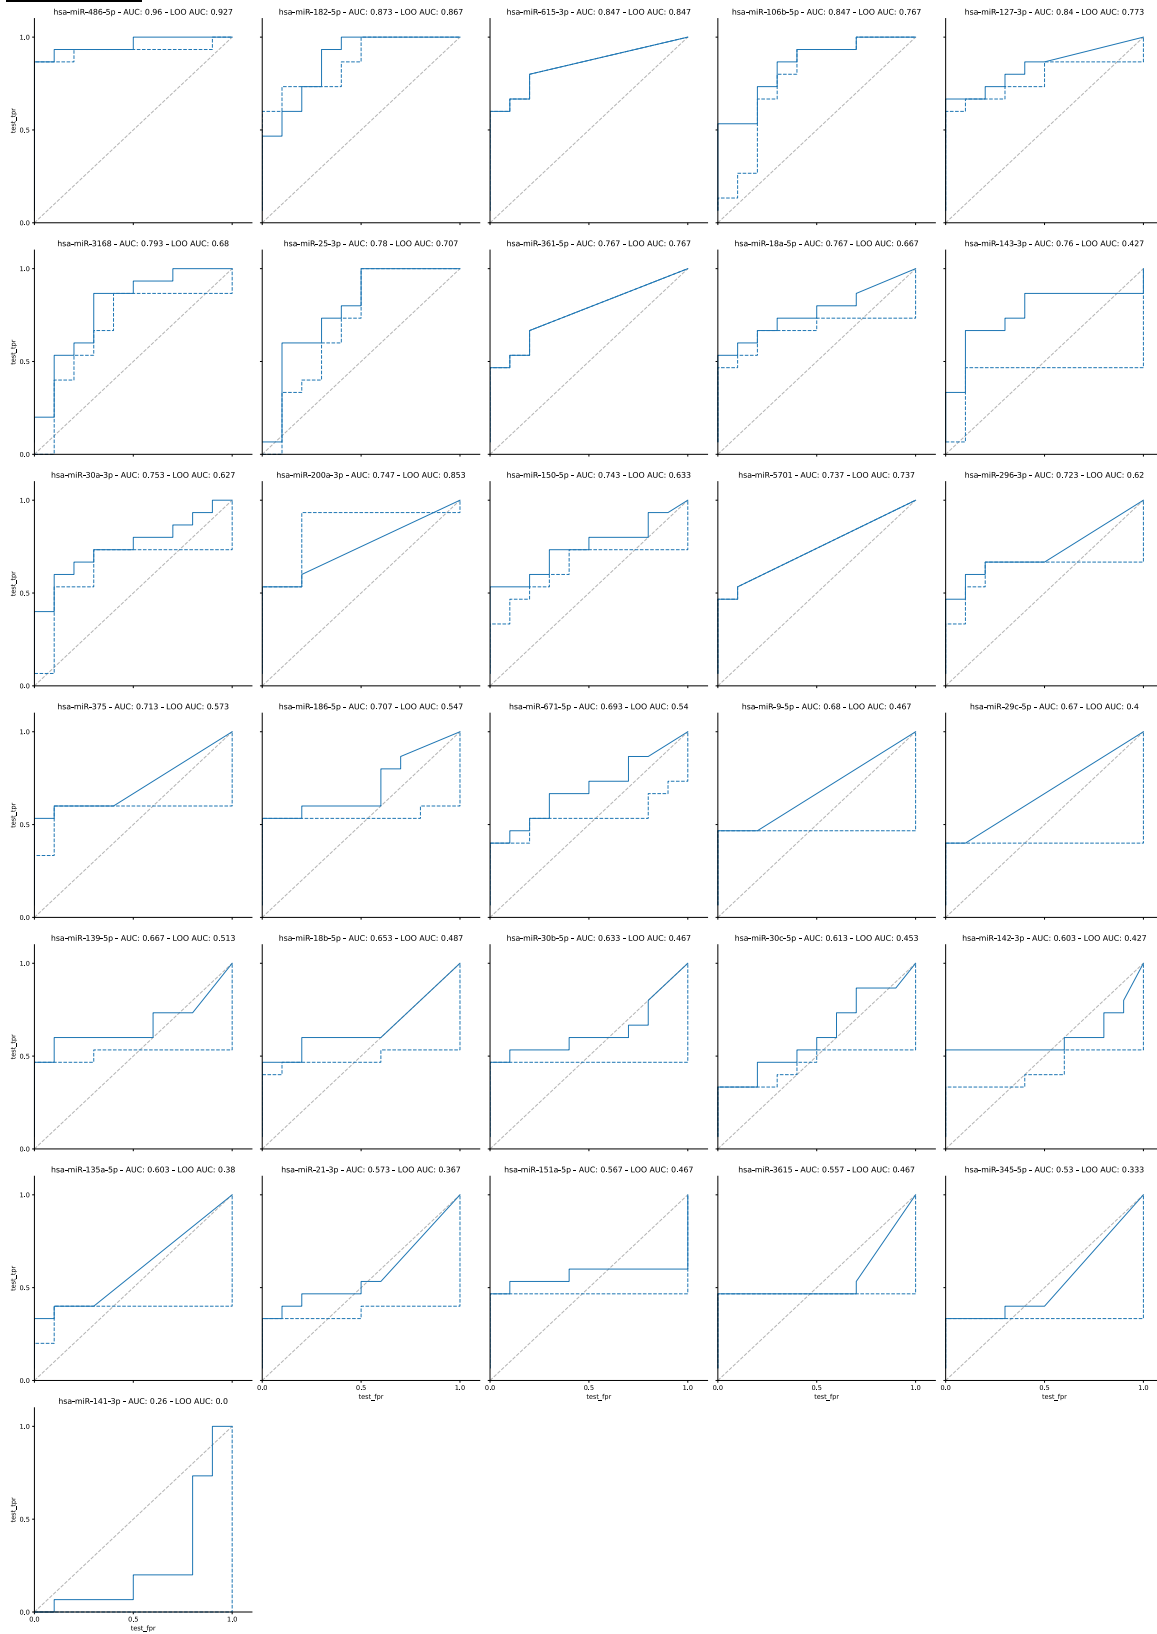

Figure S7.A. pre ACR+AMR

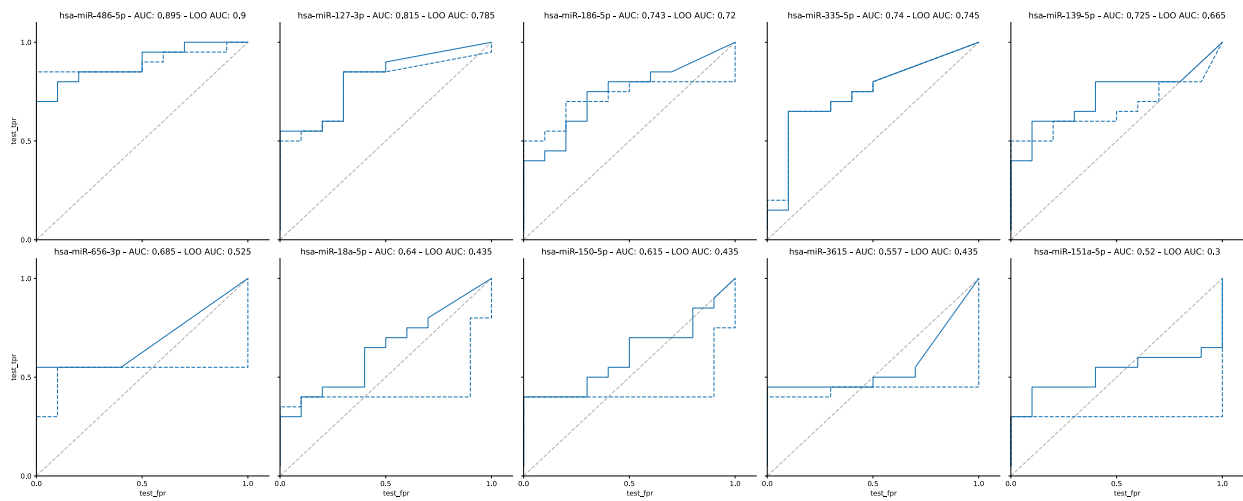

**Figure S7.B. at ACR+AMR**

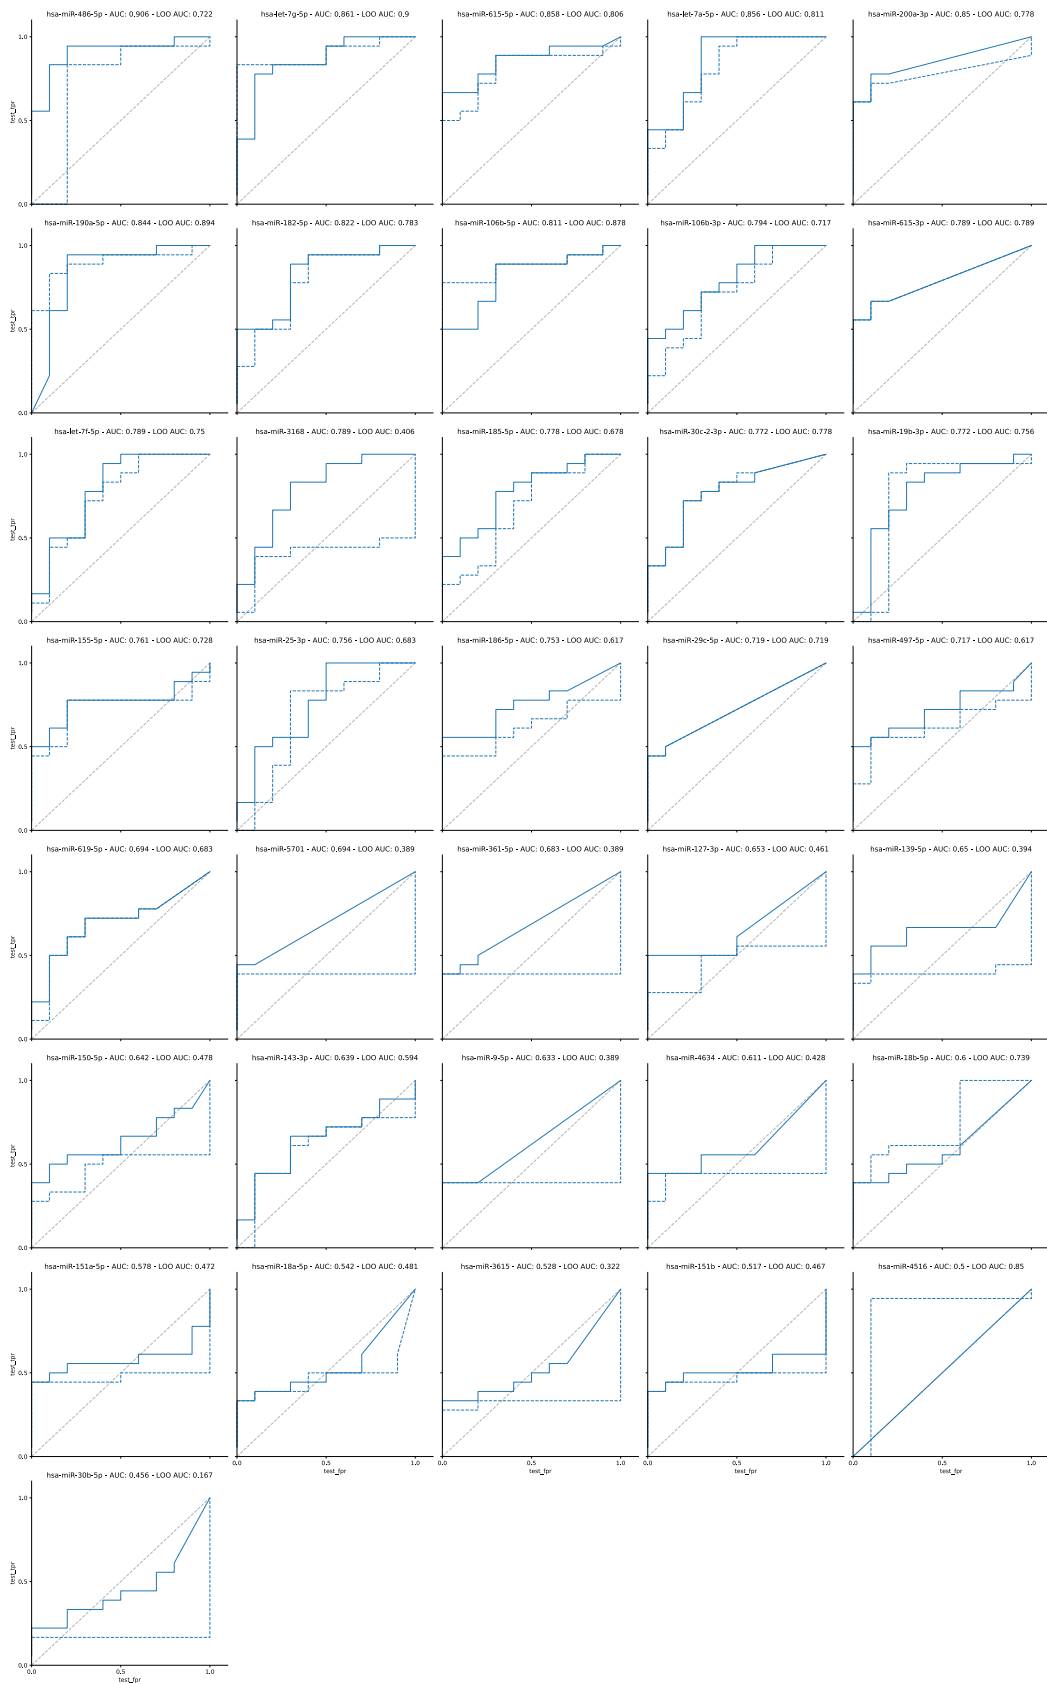

**Figure S7.C. Post AMR+ACR**



**ROC CURVES – Logistic Regression with LEAVE ONE OUT using all features**

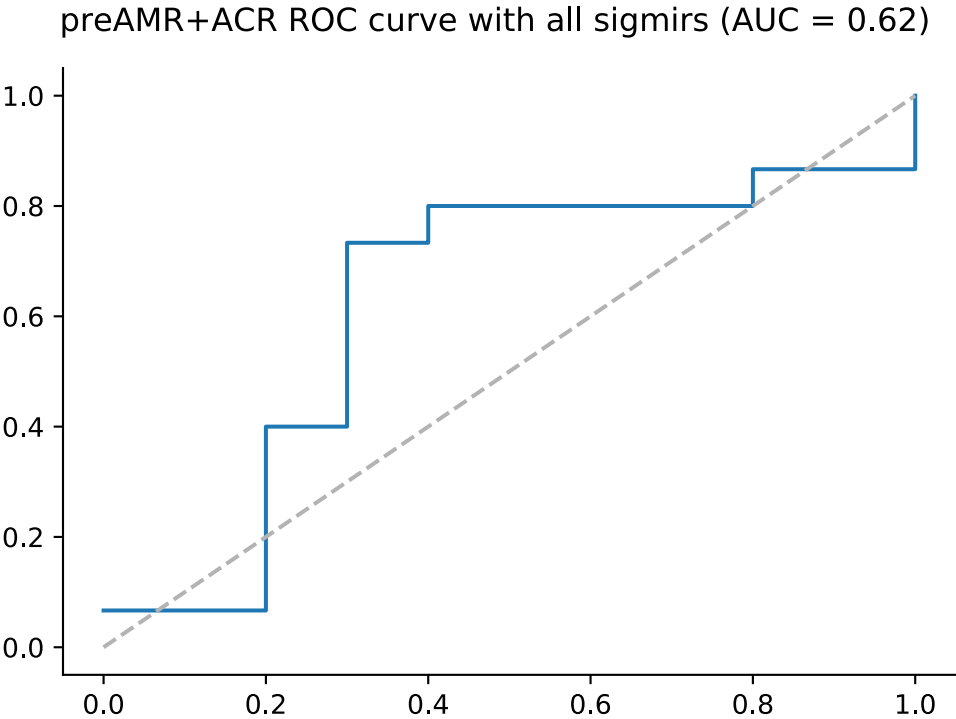

**Figure S8.A. ROC curve, all sigmirs AMR+ACR before rejection**

atAMR+ACR ROC curve with all sigmirs (AUC = 0.6)

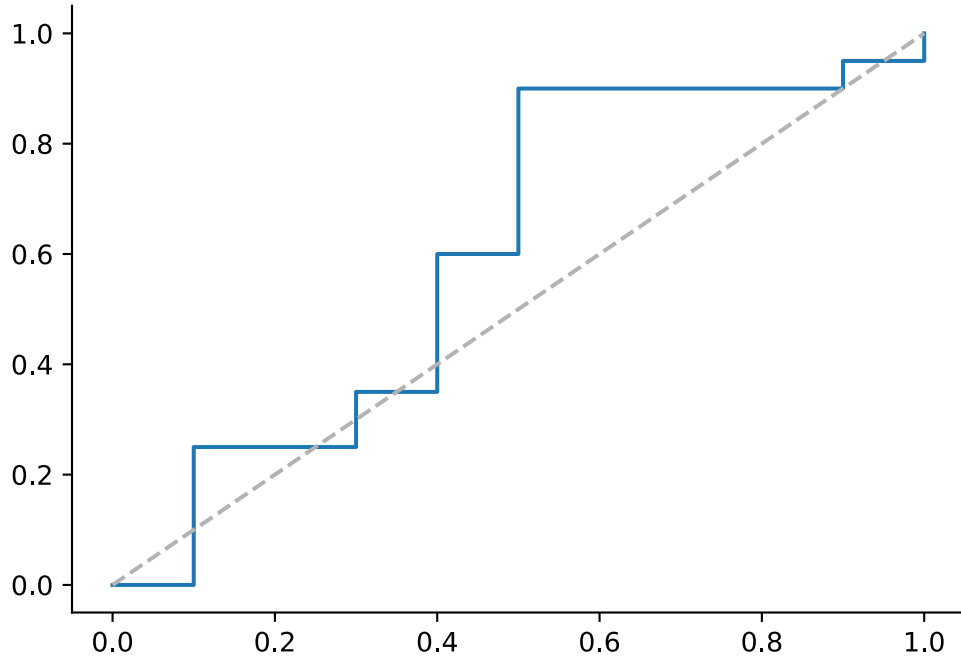

Figure S8.B. ROC curve, all sigmirs AMR+ACR before rejection

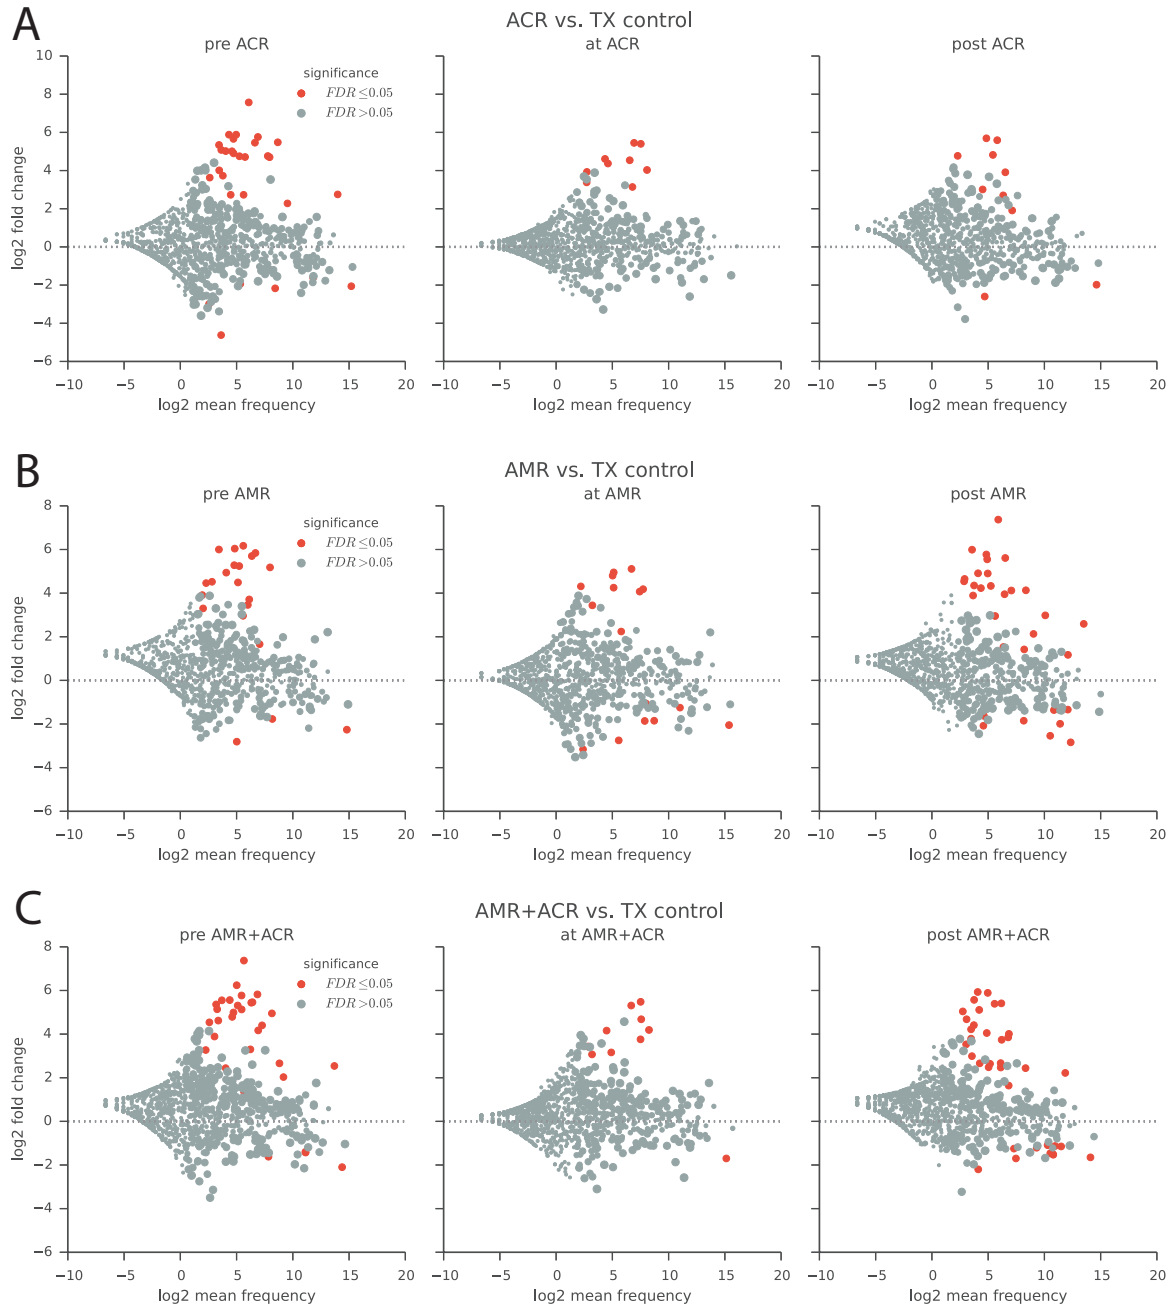

Figure S9. Significant miRNA abundances
